# Supplementary material for: Development of a nomogram for the prediction of complicated appendicitis during pregnancy
Source: Research Square preprint supplement (doi:10.21203/rs.3.rs-2445811/v1), 2023-01-12
Supplement: Supplementary file 1 [file 2ae3fdaa715e199bb2604241.docx]

eTable1. The baseline characteristics of acute appendicitis during pregnancy.

| **Variables** | **N=91** |
| --- | --- |
| **Demographic characteristics** | |
| Age (years) | 28.7 (3.28) |
| Gestational age (weeks) | 19.4 (8.38) |
| Pulse (/min) | 93.7 (14.5) |
| History of AA |  |
| NO | 83 (91.2%) |
| YES | 8 (8.79%) |
| **Signs and Symptoms** |  |
| Duration of abdominal pain (h) |  |
| ＜24h | 48 (52.7%) |
| ≥24h | 43 (47.3%) |
| Parturition |  |
| 0 | 60 (65.9%) |
| 1 | 30 (33.0%) |
| 2 | 1 (1.10%) |
| Vomiting |  |
| NO | 24 (26.4%) |
| YES | 67 (73.6%) |
| Anorexia |  |
| NO | 50 (54.9%) |
| YES | 41 (45.1%) |
| Diarrhea |  |
| NO | 77 (84.6%) |
| YES | 14 (15.4%) |
| TEMP (℃) |  |
| NO | 83 (91.2%) |
| YES | 8 (8.79%) |
| Shifting pain in right lower quadrant |  |
| NO | 41 (45.1%) |
| YES | 50 (54.9%) |
| Rebound pain in right lower quadrant |  |
| NO | 28 (30.8%) |
| YES | 63 (69.2%) |

eTable1. The baseline characteristics of acute appendicitis during pregnancy. (continued)

| **Variables** | **N=91** |
| --- | --- |
| **Laboratory examinations** |  |
| WBC | 13.8 [11.1;17.1] |
| NEUT% | 87.3 [83.8;90.8] |
| CRP | 24.7 [5.48;56.7] |
| NLR | 10.4 [7.30;17.3] |
| TBIL | 10.5 [7.80;14.2] |
| PLT | 221 (53.1) |
| **Ultrasound imaging** |  |
| NO | 37 (40.7%) |
| YES | 54 (59.3%) |

AA, acute appendicitis; TEMP, temperature; WBC, white blood cell count; NEUT%, neutrophil percentage; CRP, C-reactive protein; NLR, neutrophil-to-lymphocyte ratio; TBIL, total bilirubin

PLT, platelet count.
